# Supplementary material for: In situ passivation of Fe nanoparticles exsolved from perovskite cathodes through zinc doping for CO2 electrolysis
Source: Royal Society of Chemistry journal article supplement (doi:10.1039/d3gc03518b), 2023-01-01
Supplement: d3gc03518b1.pdf [file d3gc03518b1.pdf]

## Electronic Supplementary Information

### *In-situ* passivation of Fe nanoparticles exsolved from perovskite cathodes through Zinc doping for CO<sub>2</sub> electrolysis

Shuai Liu,<sup>‡a</sup> Meiting Yang,<sup>‡a</sup> Ruijia Xu,<sup>a</sup> Xinghe Xiang,<sup>a</sup> Guangming Yang,<sup>\*a</sup>  
Haoran Xu,<sup>b</sup> Gang Xiao,<sup>b</sup> Ran Ran,<sup>a</sup> Wei Zhou<sup>a</sup> and Zongping Shao<sup>\*a, c</sup>

<sup>a</sup> State Key Laboratory of Materials-Oriented Chemical Engineering, College of Chemical Engineering, Nanjing Tech University, Nanjing, 211816, China.

<sup>b</sup> State Key Laboratory of Clean Energy Utilization, Zhejiang University, Hangzhou 310027, China

<sup>c</sup> WA School of Mines: Minerals, Energy and Chemical Engineering, Curtin University, Perth, Western Australia, 6845, Australia.

#### Corresponding Authors

\*E-mail: [ygm89525@njtech.edu.cn](mailto:ygm89525@njtech.edu.cn) (G.Y.)

\*E-mail: [shaozp@njtech.edu.cn](mailto:shaozp@njtech.edu.cn) (Z.S.)

<sup>‡</sup> These authors contributed equally to this work.

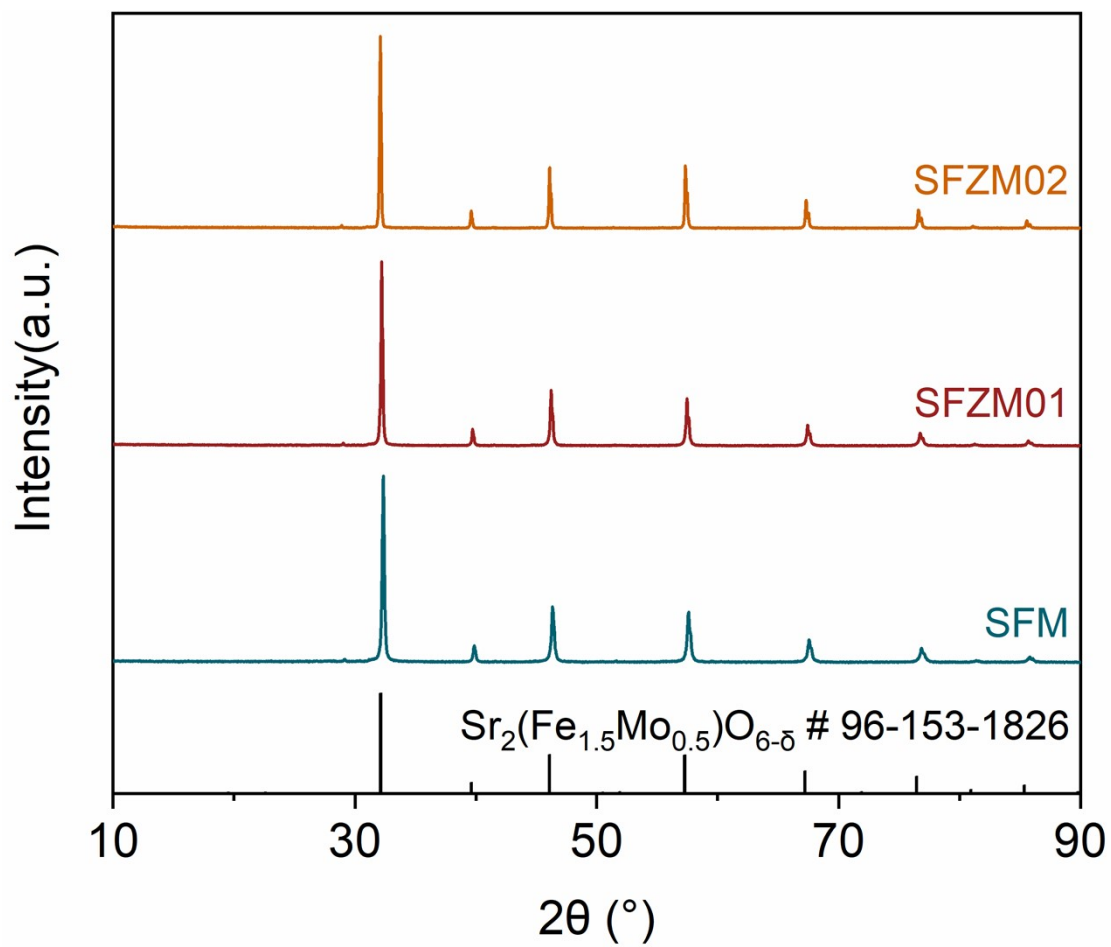

**Fig. S1.** XRD patterns of as-synthesized SFM, SFZM01, and SFZM02 powders.

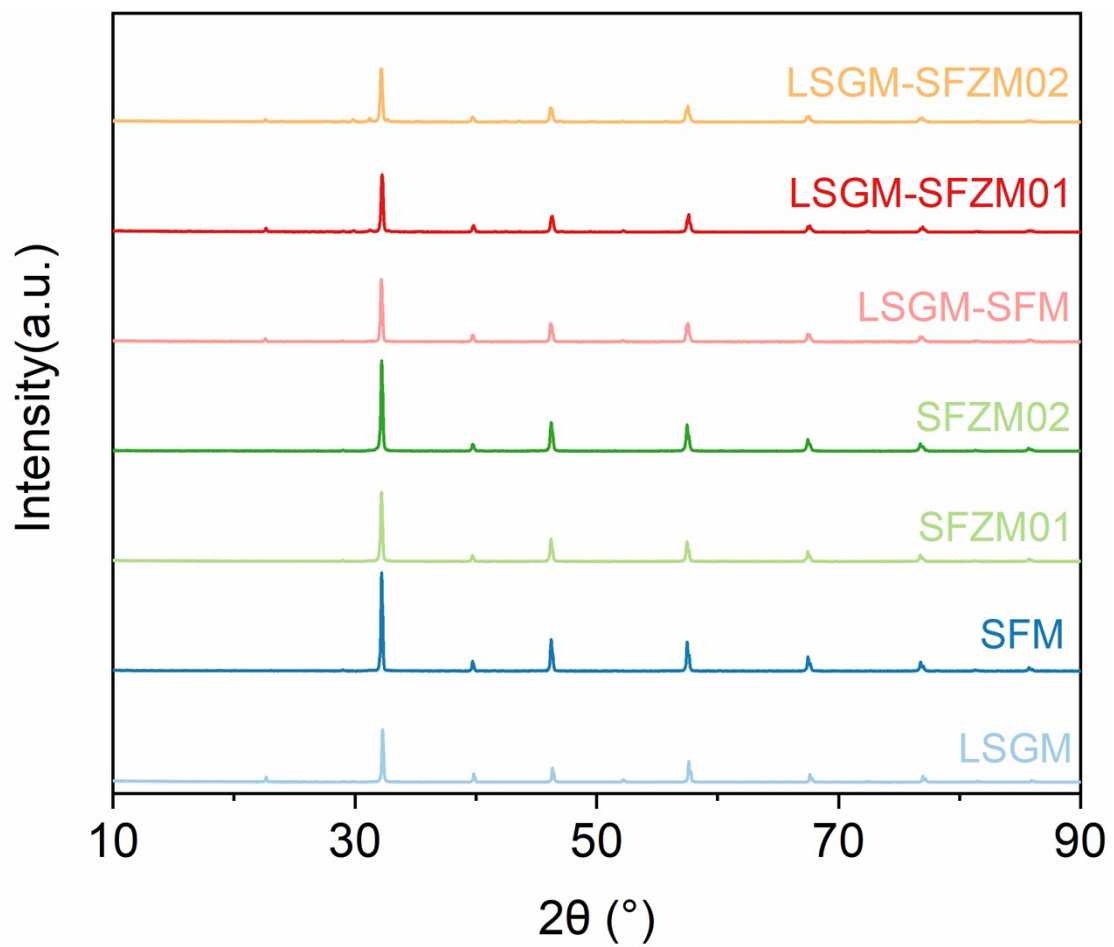

**Fig. S2.** XRD patterns of LSGM and SFZM<sub>x</sub> powders with mass ratio of 1:1 after sintering in air for 10 hours.

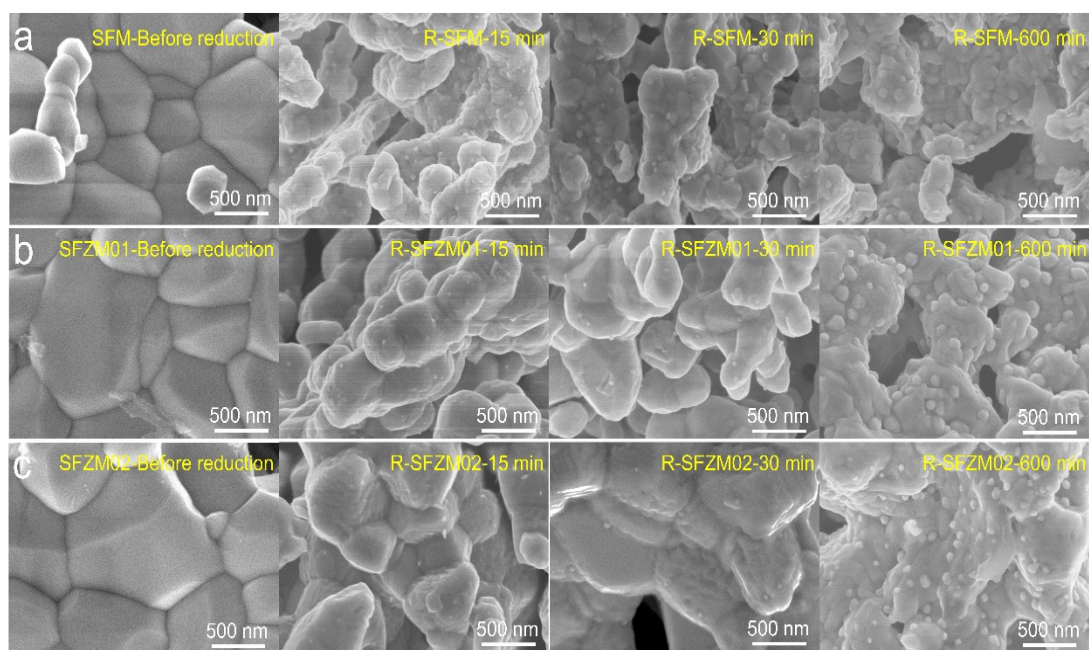

**Fig. S3.** SEM images of (a) SFM, (b) SFZM01, (c) SFZM02 powders before and after treatment under 10% H<sub>2</sub>-Ar for different time (15, 30, 600 min)

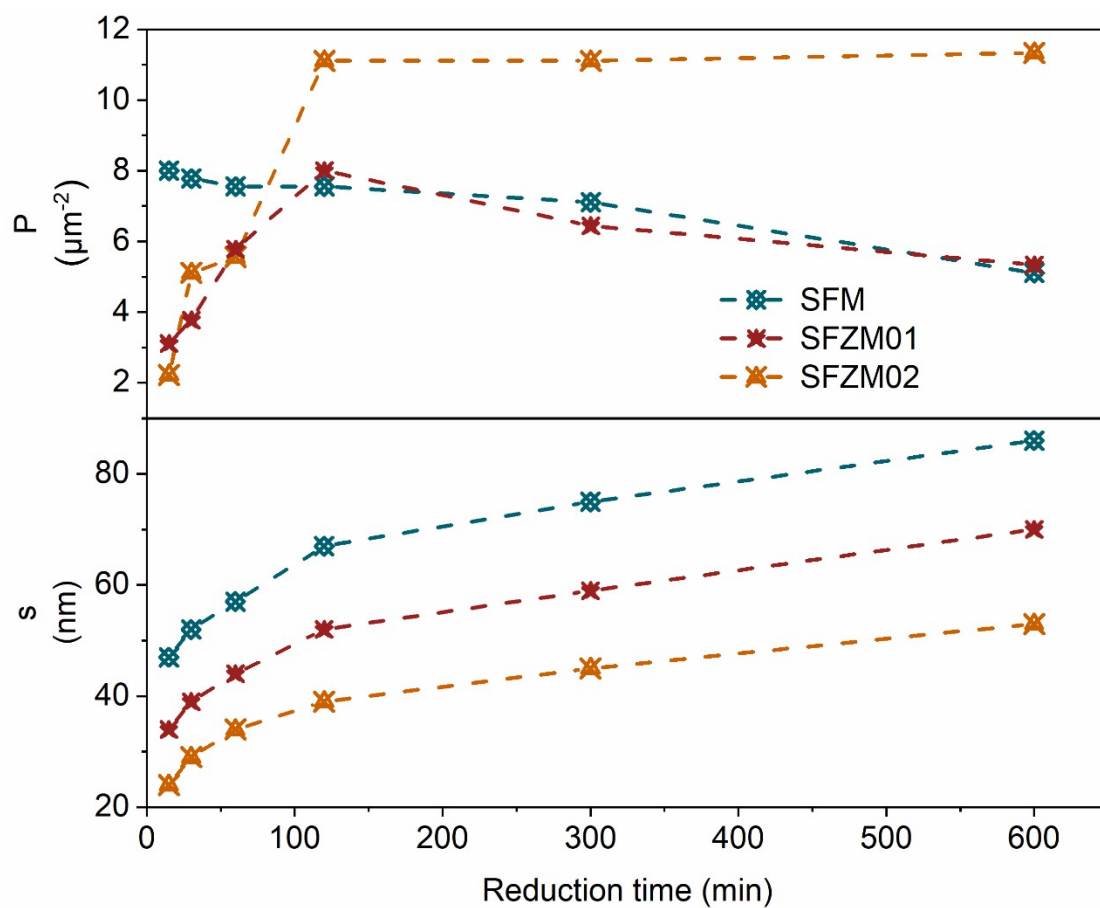

**Fig. S4.** Particle average diameter size and population density of exsolved NPs determined by SEM image analysis for various time (from 15 to 600 min).

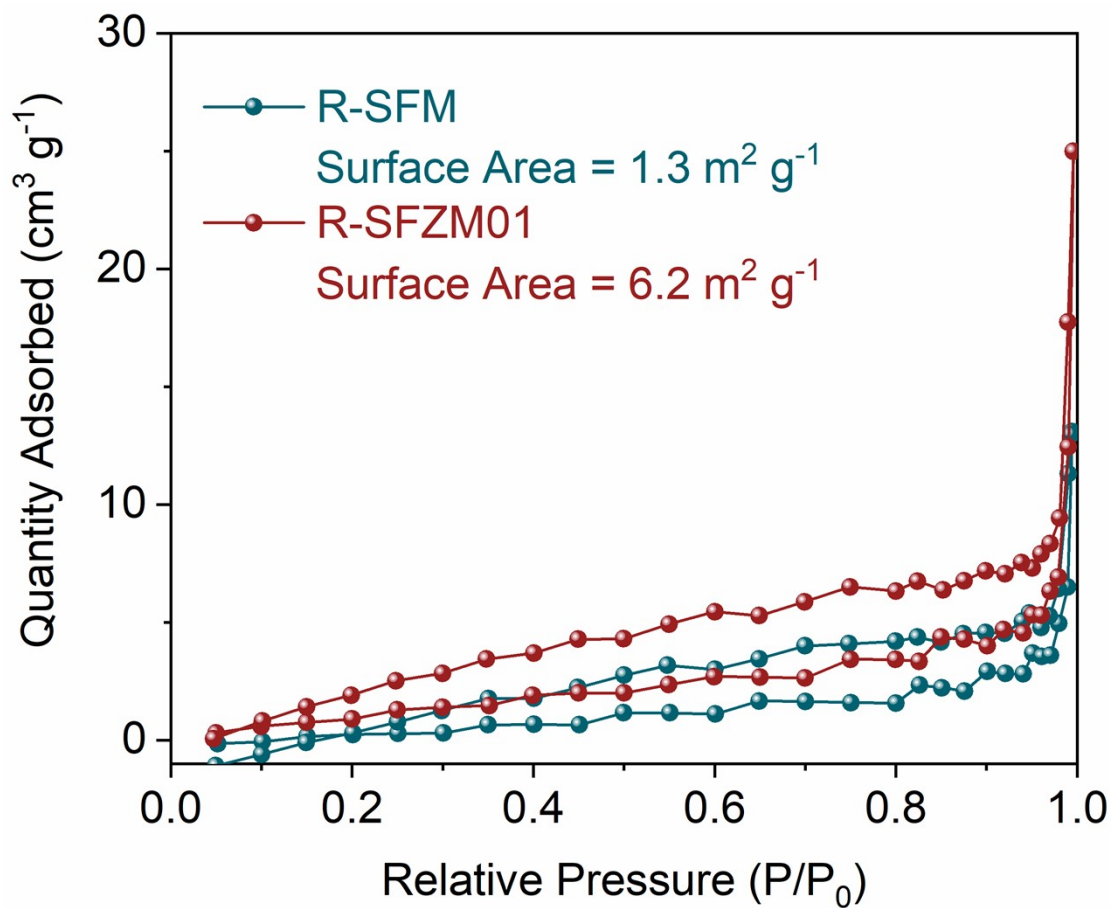

**Fig. S5.** N<sub>2</sub> adsorption/desorption isotherms of SFM and SFZM01 after reduction under 10% H<sub>2</sub>-Ar at 800 °C for 120 min.

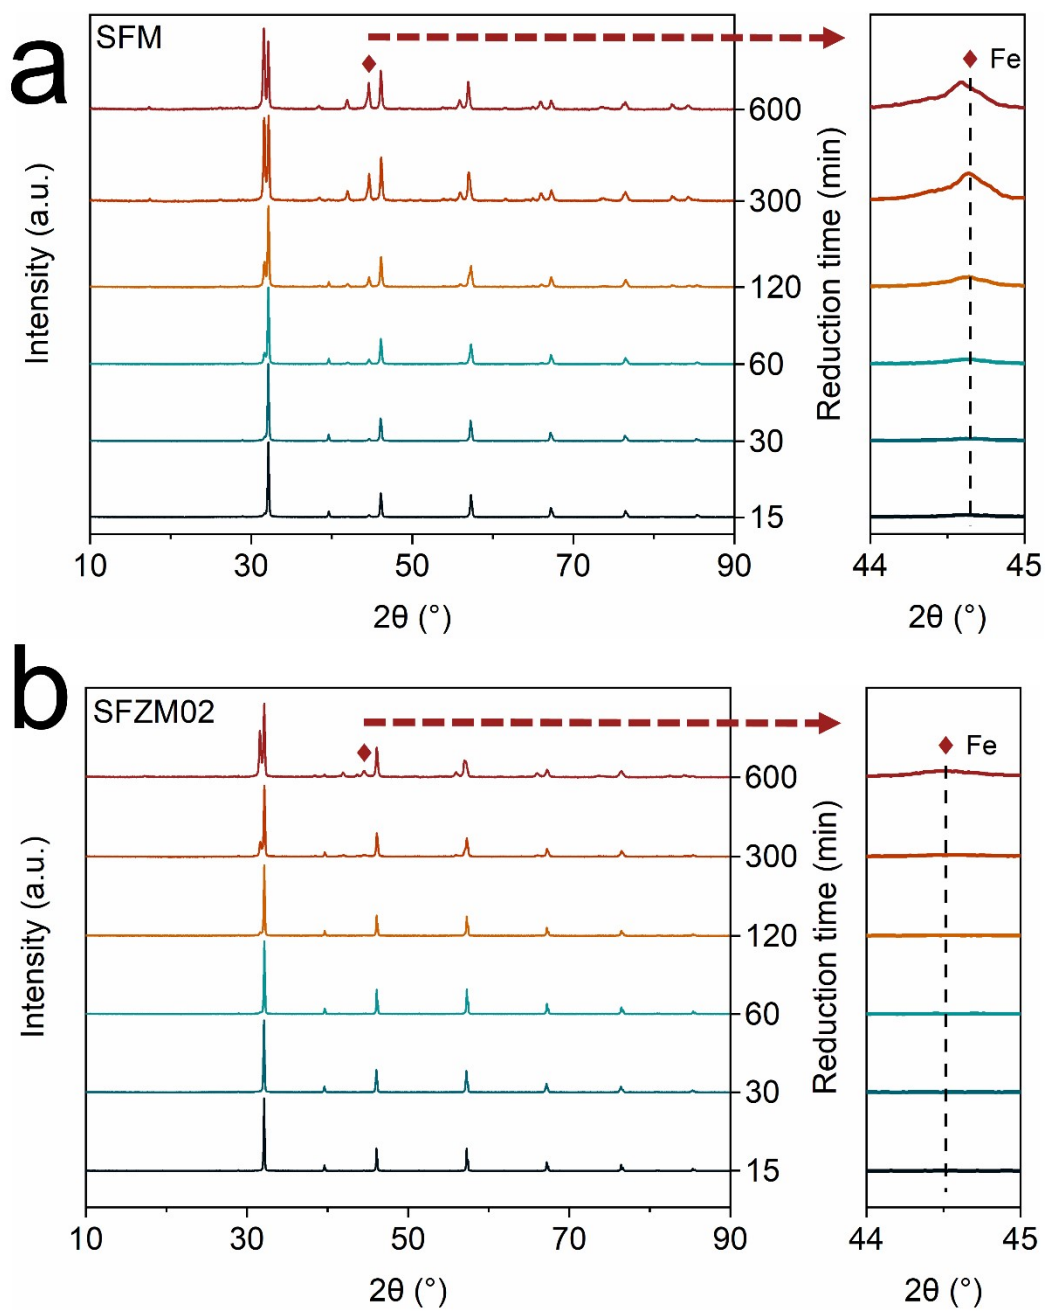

**Fig. S6.** XRD patterns of (a) SFM and (b) SFZM02 after reduction treatments (annealing from 15 to 600 min).

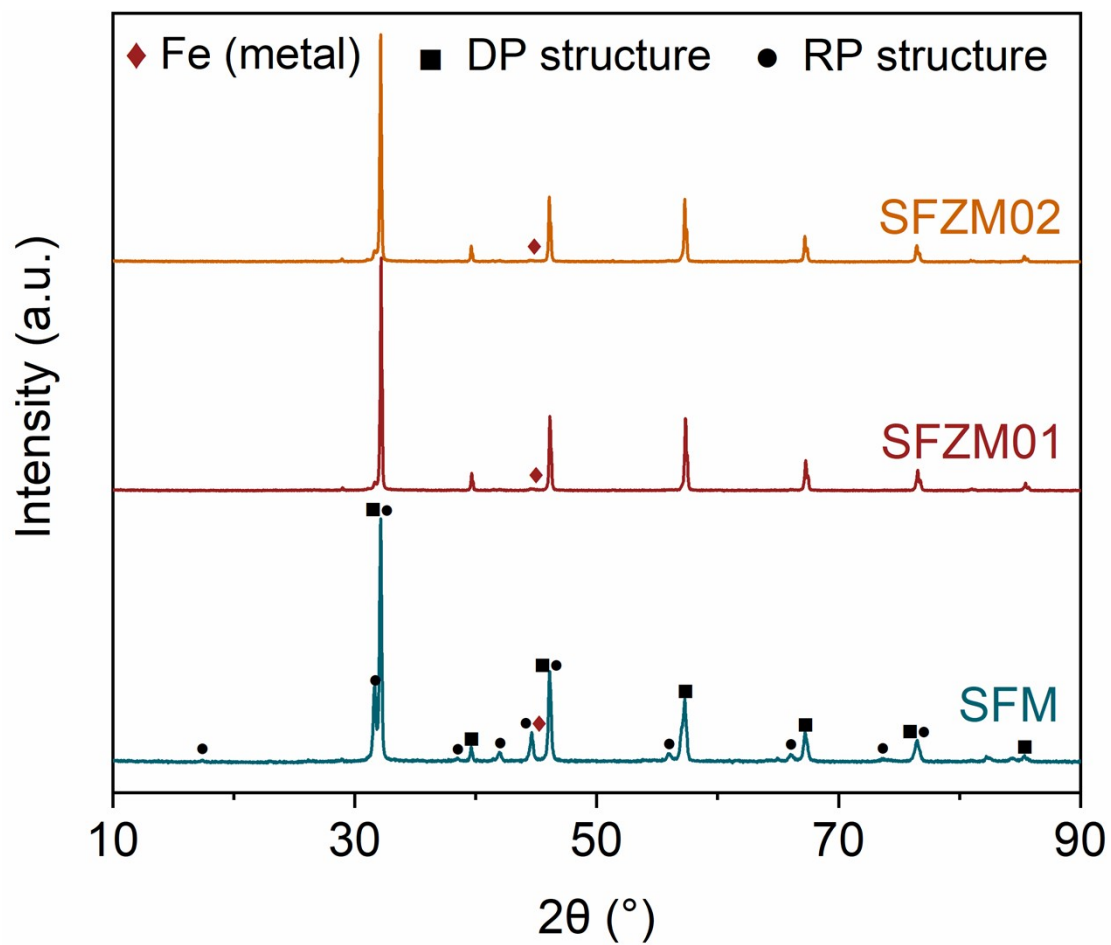

**Fig. S7.** XRD patterns of the SFM, SFZM01, and SFZM02 after reduction under 10%  $H_2/N_2$  atmosphere at 800 °C for 2 h.



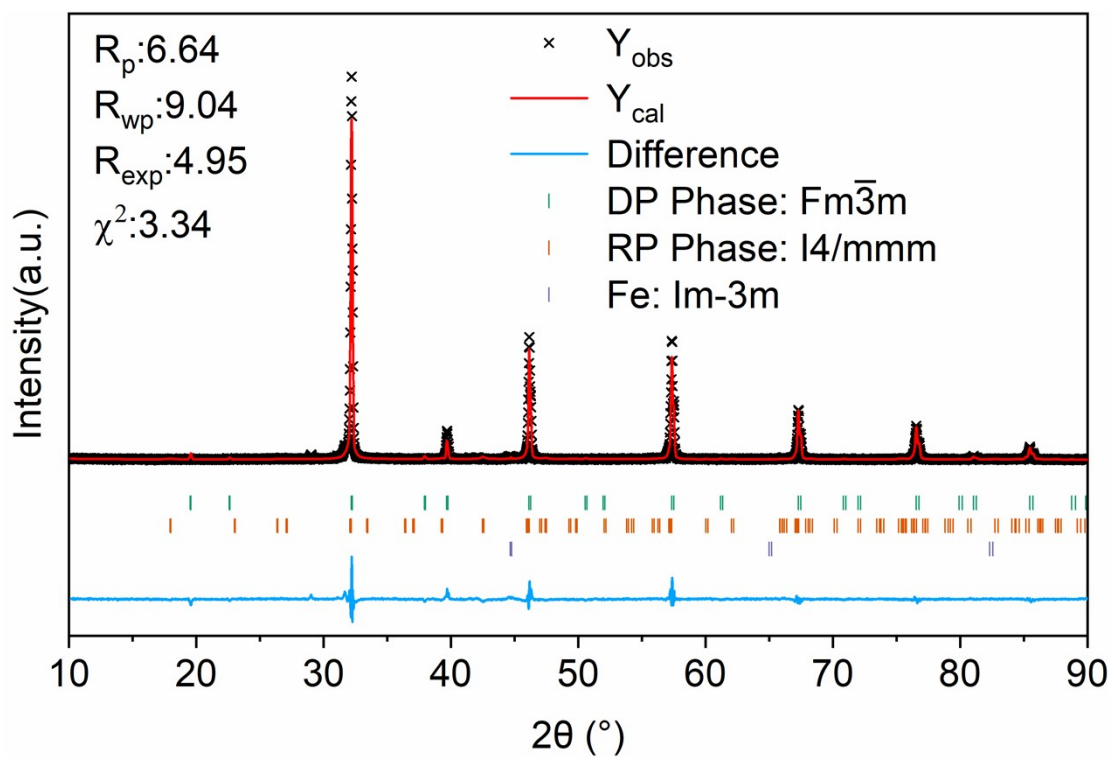

**Fig. S8.** Rietveld refinement of the reduced SFZM01 after reduction under 10% H<sub>2</sub>/N<sub>2</sub> atmosphere at 800 °C for 2 h.

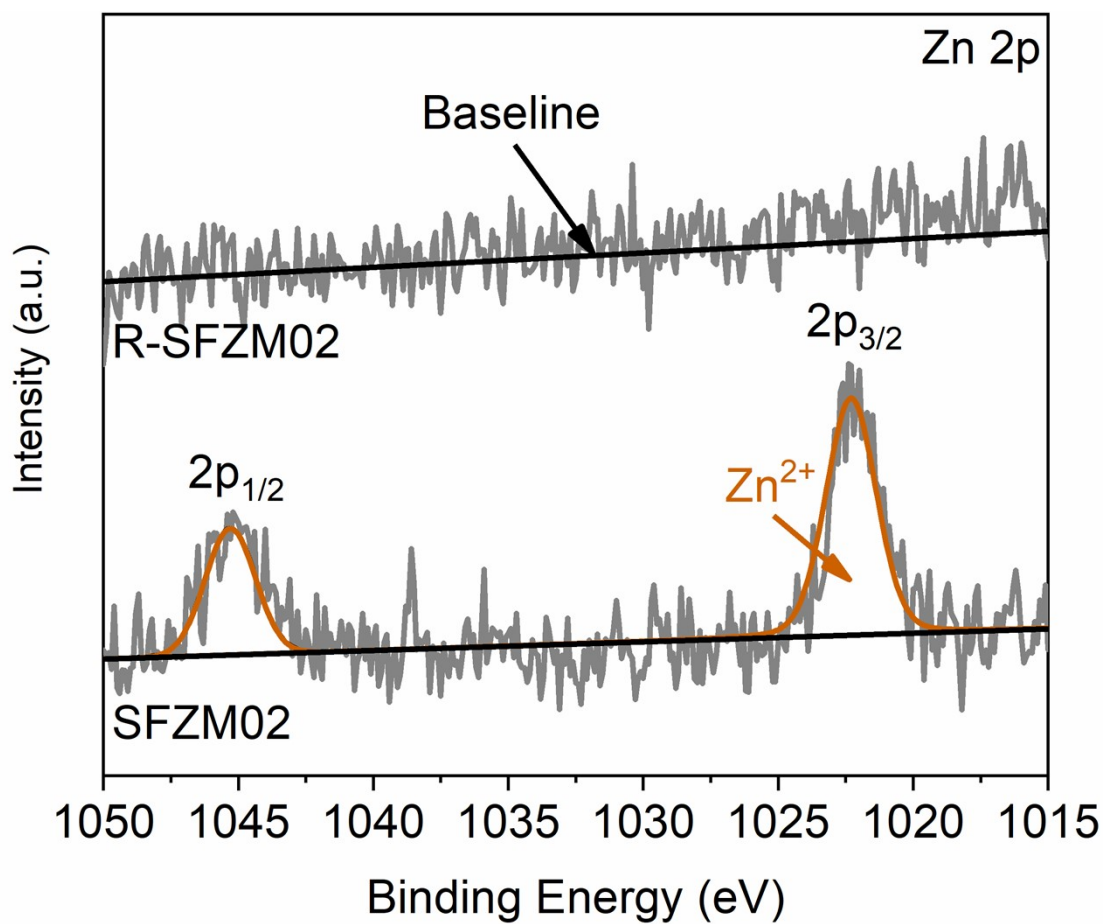

**Fig. S9.** XPS spectra of Zn 2p for oxidized and reduced SFZM02 samples.

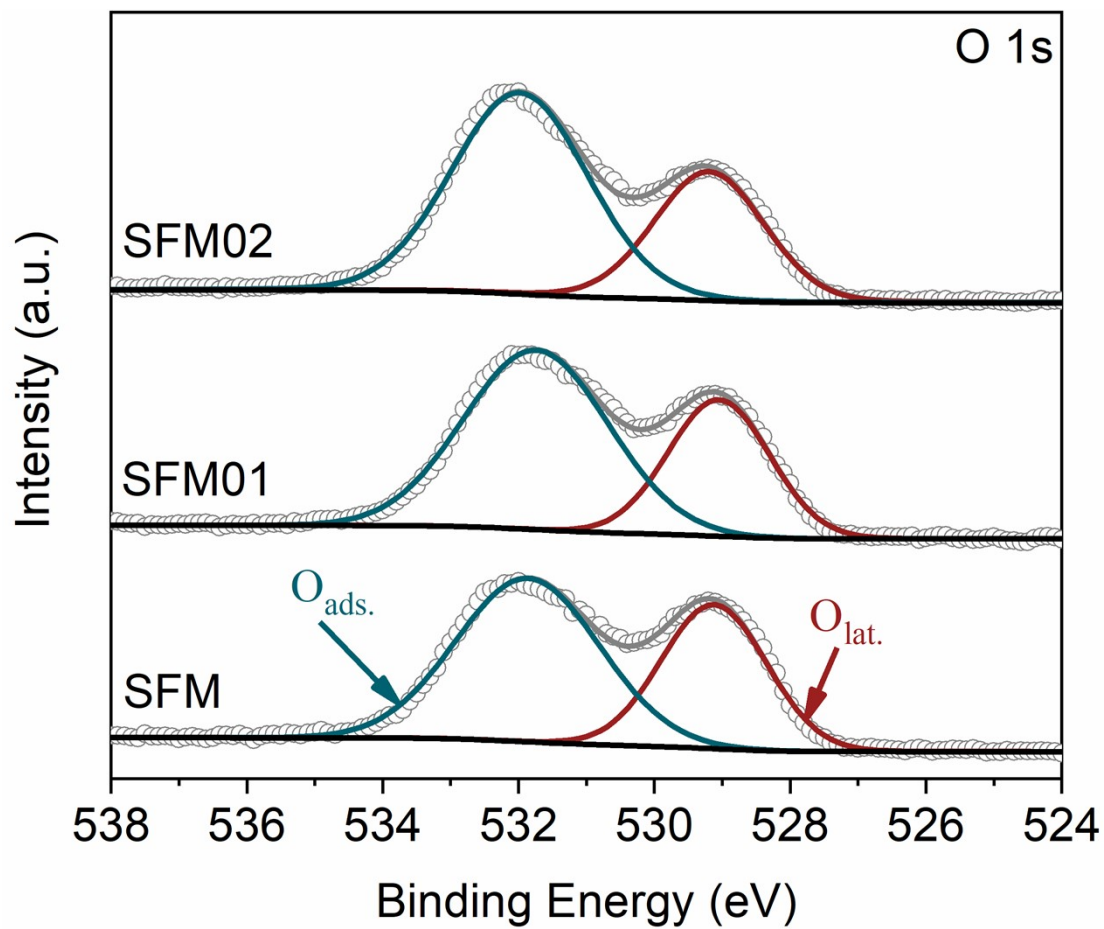

Fig. S10. XPS spectra of O 1s of SFZMx.

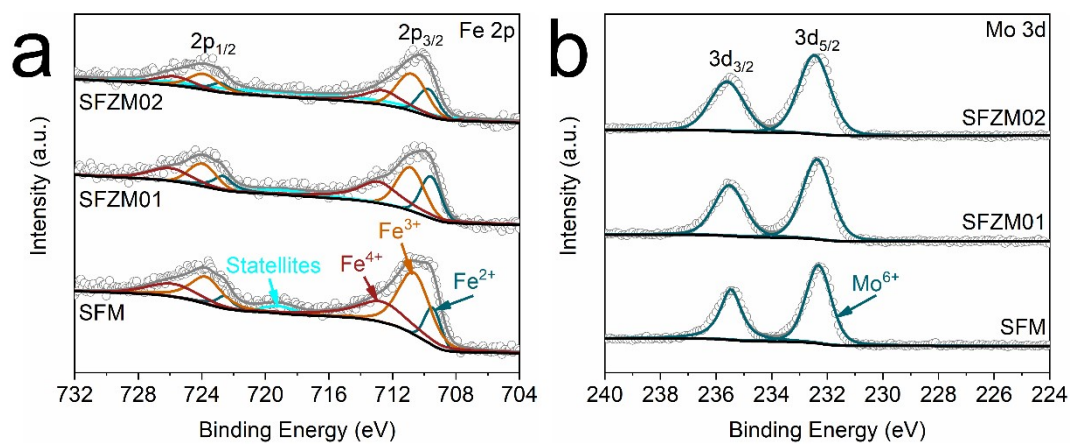

**Fig. S11.** XPS spectra of (a) Fe 2p, (b) Mo 3d of SFZMx.

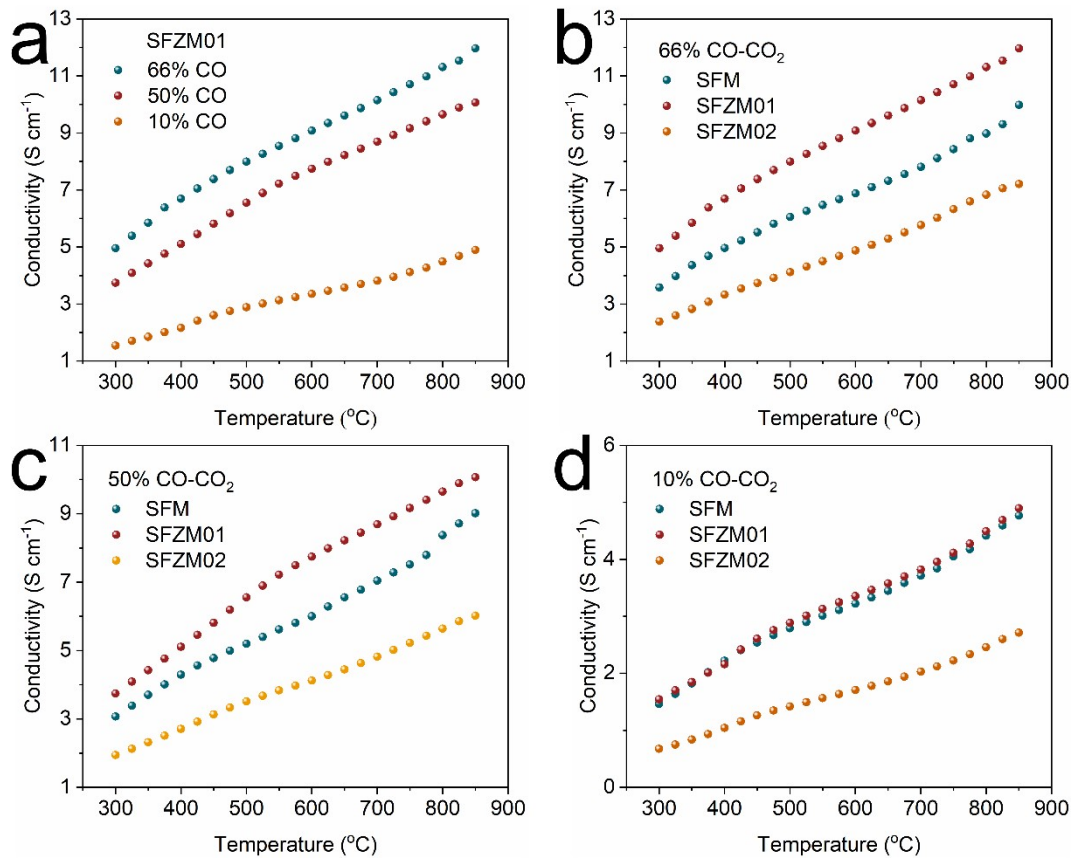

**Fig. S12.** Conductivity of the R-SFM, R-SFZM01 and R-SFZM02 in different CO partial pressures at 300-850 °C.

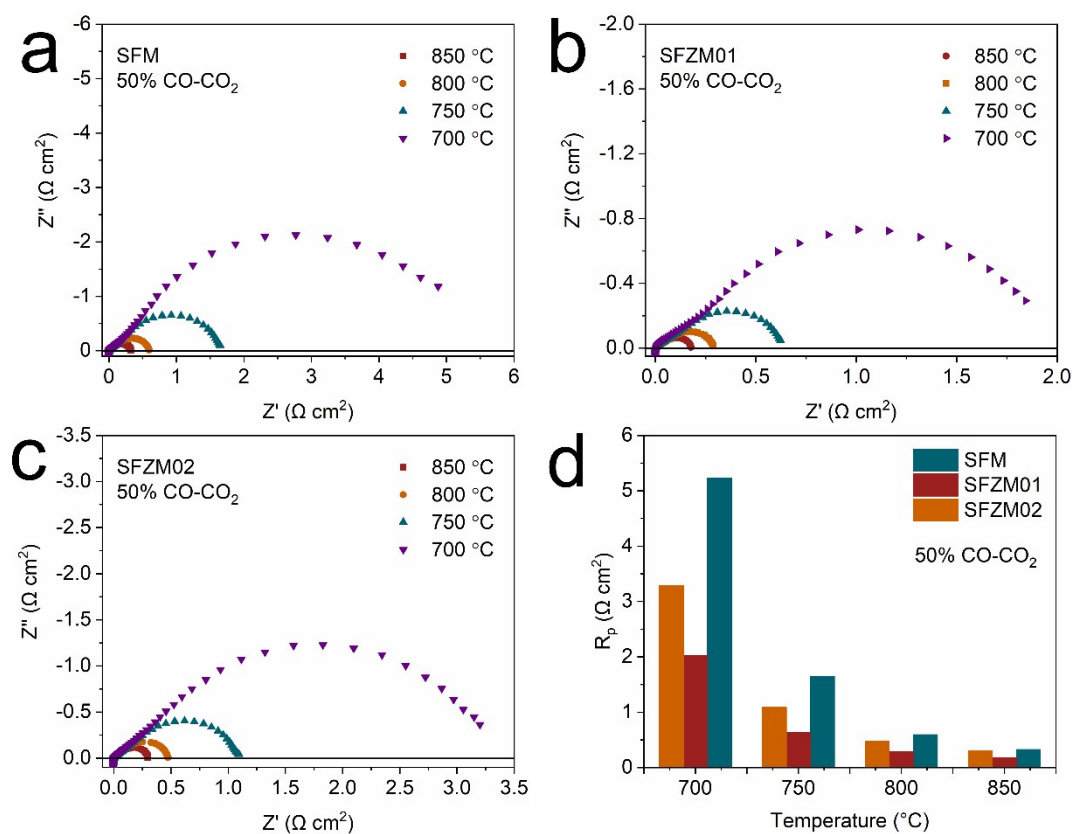

**Fig. S13.** EIS of the symmetrical cells with (a) SFM, (b) SFZM01, and (c) SFZM02 electrodes at 700-850 °C in 50% CO-CO<sub>2</sub>. (d) Comparison of polarization impedance of three cathodes at different temperatures.

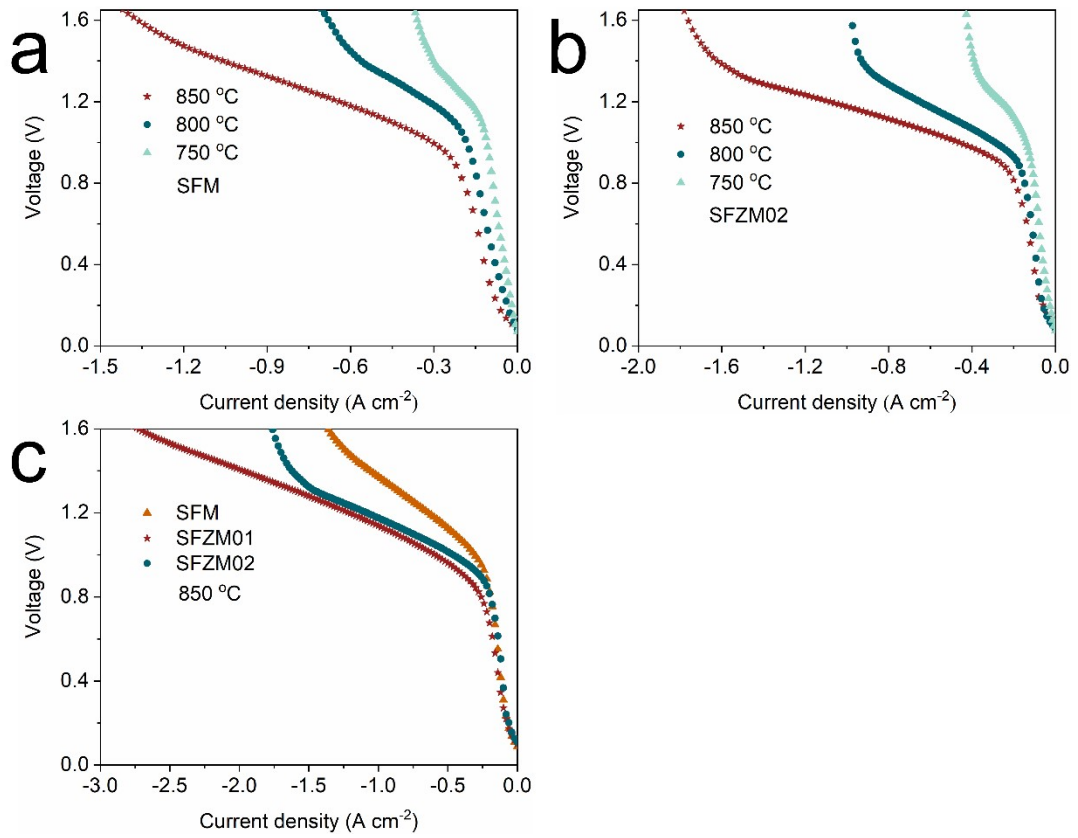

**Fig. S14.** (a, b) I-V curves from 750 to 850 °C of SFM/SFZM02|LSGM|BSCF single cells. (c) Comparison of I-V curves of three single cells at 850 °C.

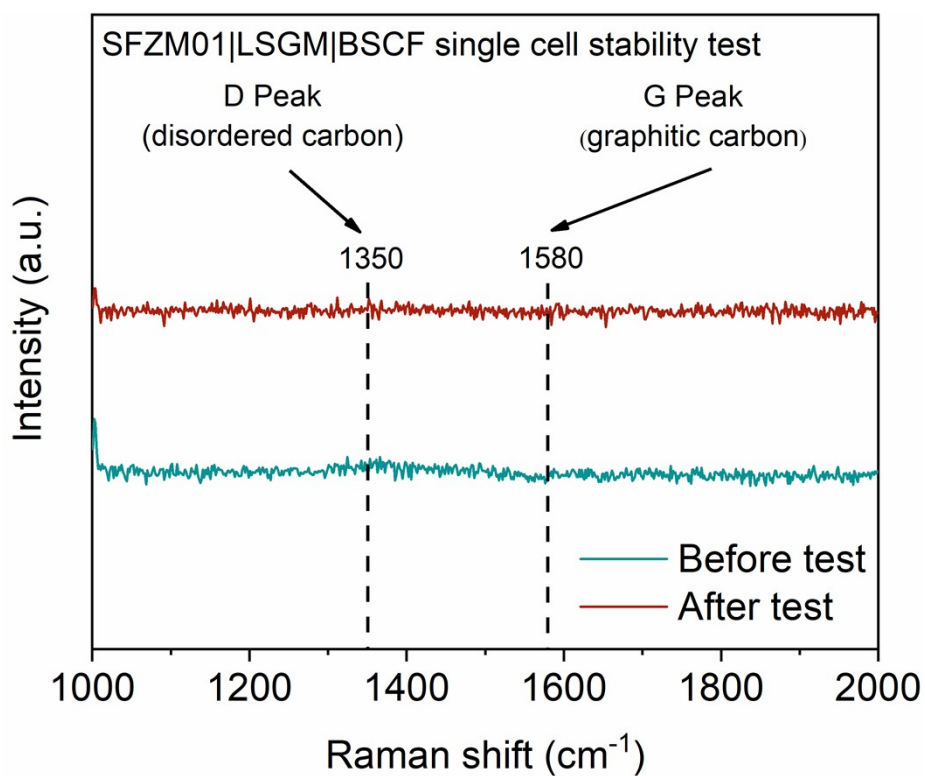

**Fig. S15.** Raman spectra of the surface of SFZM01 cathode before and after the durability test.



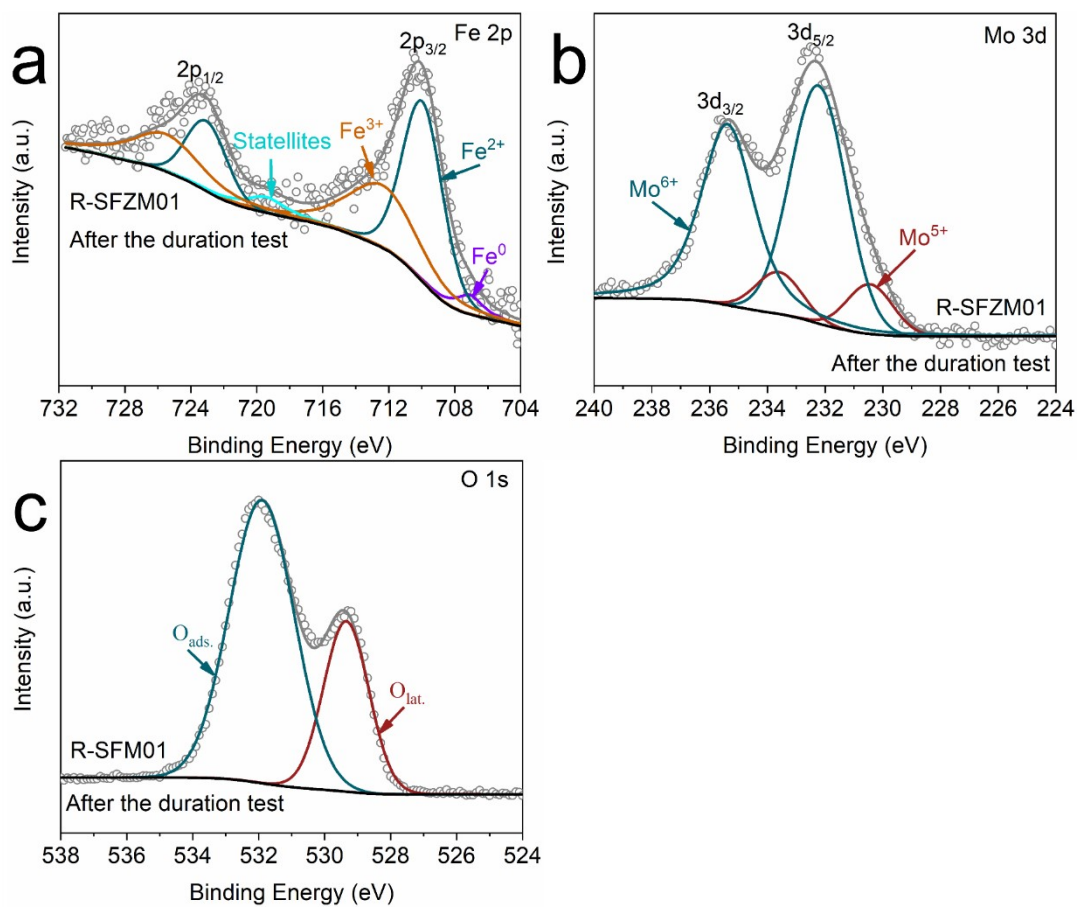

**Fig. S16.** XPS spectra of (a) Fe 2p, (b) Mo 3d, and (c) O 1s of R-SFZM01 cathode after the duration test.

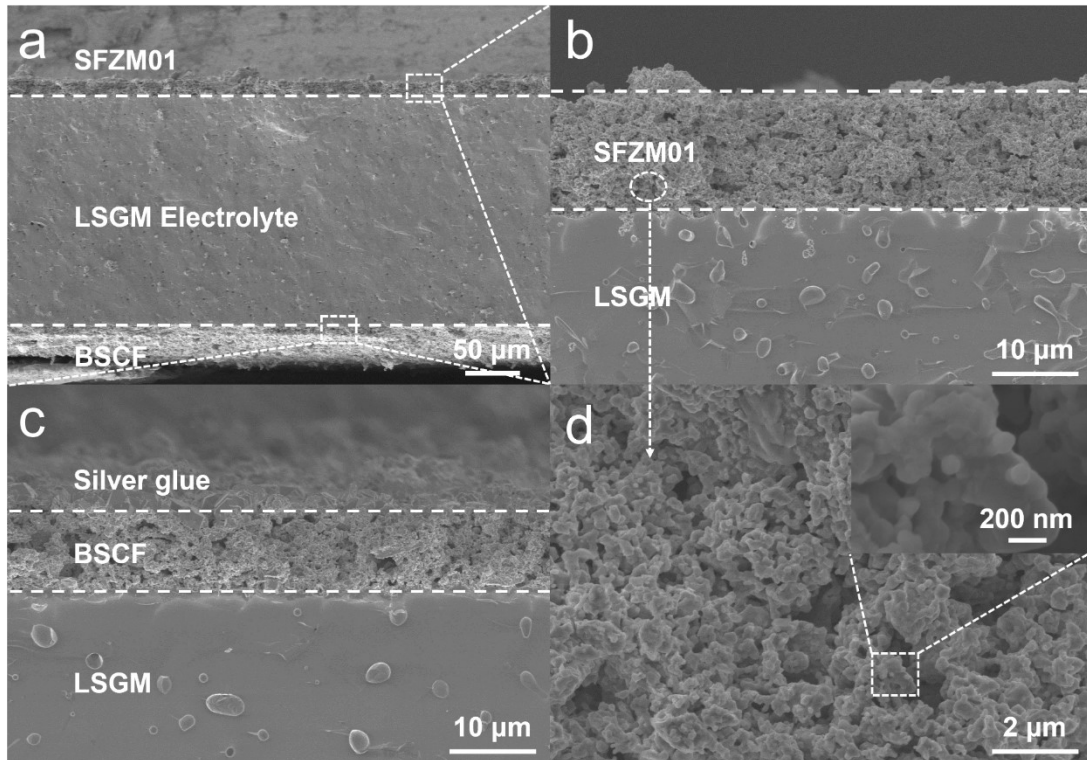

**Fig. S17.** SEM images of single cell after stability test. (a) Full view of single cell with SFZM01|LSGM|BSCF configuration. Detailed morphology of the interface between electrolyte with (b) SFZM01 cathode and (c) BSCF anode. (d) The morphology of SFZM01 cathode.

**Table S1.** Refinement parameters of SFZM01 powder and the reduced SFZM01.

| Sample         | Composition | $R_p$ | $R_{wp}$ | $\chi^2$ | Space group | a (Å)   | b (Å)   | c (Å)    |
|----------------|-------------|-------|----------|----------|-------------|---------|---------|----------|
| SFZM01         | -           | 5.49  | 7.83     | 2.98     | Fm-3m       | 7.84384 | 7.84384 | 7.84384  |
| Reduced SFZM01 | DP-SFZM01   | 6.64  | 9.04     | 3.34     | Fm-3m       | 7.86391 | 7.86391 | 7.86391  |
|                | RP-SFZM01   | 6.64  | 9.04     | 3.34     | I4/mmm      | 3.94044 | 3.94044 | 19.74541 |
|                | Fe          | 6.64  | 9.04     | 3.34     | Im-3m       | 2.86665 | 2.86665 | 2.86665  |

**Table S2.** XPS fitting results of Fe 2p<sub>3/2</sub>, Mo 3d<sub>5/2</sub> and O 1s for the SFM, SFZM01 and SFZM02 powders.

| Samples                                                    | SFM   | SFZM01 | SFZM02 |
|------------------------------------------------------------|-------|--------|--------|
| Fe <sup>0</sup> (at.%)                                     | 0     | 0      | 0      |
| Fe <sup>2+</sup> (at.%)                                    | 13.76 | 24.77  | 22.59  |
| Fe <sup>3+</sup> (at.%)                                    | 51.33 | 36.54  | 45.48  |
| Fe <sup>4+</sup> (at.%)                                    | 34.91 | 38.69  | 31.93  |
| Average valence of Fe                                      | +3.21 | +3.14  | +3.09  |
| Mo <sup>5+</sup> (at.%)                                    | 0     | 0      | 0      |
| Mo <sup>6+</sup> (at.%)                                    | 1     | 1      | 1      |
| Average valence of Mo                                      | +6    | +6     | +6     |
| O <sub>S</sub> / (O <sub>L</sub> + O <sub>S</sub> ) (at.%) | 60.59 | 65.04  | 65.52  |

**Table S3.** XPS fitting results of Fe 2p<sub>3/2</sub>, Mo 3d<sub>5/2</sub> and O 1s for R-SFM, R-SFZM01, and R-SFZM02 powders.

|                                                              | R-SFM | R-SFZM01 | R-SFZM02 |
|--------------------------------------------------------------|-------|----------|----------|
| Fe <sup>0</sup> (at.%)                                       | 9.55  | 5.64     | 3.14     |
| Fe <sup>2+</sup> (at.%)                                      | 39.93 | 53.34    | 51.36    |
| Fe <sup>3+</sup> (at.%)                                      | 50.52 | 41.02    | 45.51    |
| <b>Average valence of Fe</b>                                 | +2.31 | +2.30    | +2.39    |
| Mo <sup>5+</sup> (at.%)                                      | 10.83 | 12.37    | 11.54    |
| Mo <sup>6+</sup> (at.%)                                      | 89.17 | 87.63    | 88.46    |
| <b>Average valence of Mo</b>                                 | +5.89 | +5.88    | +5.88    |
| <b>O<sub>S</sub>/ (O<sub>L</sub> + O<sub>S</sub>) (at.%)</b> | 67.05 | 70.10    | 67.30    |

**Table S4.** XPS fitting results of Fe 2p<sub>3/2</sub>, Mo 3d<sub>5/2</sub> and O 1s for R-SFZM01 cathode after the duration test.

|                                                              | R-SFZM01 |
|--------------------------------------------------------------|----------|
| Fe <sup>0</sup> (at.%)                                       | 5.69     |
| Fe <sup>2+</sup> (at.%)                                      | 55.18    |
| Fe <sup>3+</sup> (at.%)                                      | 39.13    |
| <b>Average valence of Fe</b>                                 | +2.28    |
| Mo <sup>5+</sup> (at.%)                                      | 14.54    |
| Mo <sup>6+</sup> (at.%)                                      | 85.46    |
| <b>Average valence of Mo</b>                                 | +5.85    |
| <b>O<sub>S</sub>/ (O<sub>L</sub> + O<sub>S</sub>) (at.%)</b> | 70.21    |
